# Supplementary material
Source: PubMed Central journal article supplement (PMC3361728)
Supplement: NIHMS368744-supplement-1_si_001.pdf [file NIHMS368744-supplement-1_si_001.pdf]

Supporting Information

**Formation of High-Capacity Protein-Adsorbing Membranes Through Simple Adsorption of Poly(acrylic acid)-Containing Films at low pH**

Somnath Bhattacharjee, Jinlan Dong, Yiding Ma, Stacy Hovde, James H Geiger, Gregory L. Baker\*, and Merlin L. Bruening\*

<sup>a</sup>*Department of Chemistry, Michigan State University, East Lansing, Michigan 48824, USA*

\* Corresponding author.

email: bruening@chemistry.msu.edu, bakerg@msu.edu

Phone: +1 517 355-9715 ext. 160

Fax: +1 517 353-1793

**Table S-1.** Water permeabilities of nylon membranes before and after modification with PSS/PAH/PAA films.

| Multilayer in membrane pore | pH of PAH and PAA deposition solution | Water permeability of unmodified nylon membranes (mL/cm <sup>2</sup> min atm) | Water permeability of modified nylon membrane (mL/cm <sup>2</sup> min atm) | Reduction of Water permeability (%) |
|-----------------------------|---------------------------------------|-------------------------------------------------------------------------------|----------------------------------------------------------------------------|-------------------------------------|
| PSS/PAH/PAA                 | 2                                     | 114±10                                                                        | 57±4                                                                       | 50±10                               |
|                             | 3                                     | 107±17                                                                        | 34±11                                                                      | 68±22                               |
|                             | 4                                     | 116±6                                                                         | 75±11                                                                      | 35±11                               |
|                             | 5                                     | 120±18                                                                        | 79±32                                                                      | 34±31                               |

Each experiment was repeated with two different membranes, and the ± values represent the standard deviation of multiple measurements on these membranes.

**Table S-2.** Water permeabilities of nylon membranes before and after modification with PSS/PAH/PAA-NTA-Cu<sup>2+</sup> films.

| Multilayer in membrane pore | pH of PAH and PAA deposition solution | Water permeability of unmodified nylon membranes (mL/cm <sup>2</sup> min atm) | Water permeability of modified nylon membrane (mL/cm <sup>2</sup> min atm) | Reduction of Water permeability (%) |
|-----------------------------|---------------------------------------|-------------------------------------------------------------------------------|----------------------------------------------------------------------------|-------------------------------------|
| PSS/PAH/PAA                 | 2                                     | 105±3                                                                         | 77±6                                                                       | 27±6                                |
|                             | 3                                     | 123±3                                                                         | 98±5                                                                       | 20±5                                |
|                             | 4                                     | 123±2                                                                         | 56±1                                                                       | 55±2                                |
|                             | 5                                     | 131±5                                                                         | 39±5                                                                       | 70±6                                |

Each experiment was repeated with two different membranes, and the ± values represent the standard deviation of multiple measurements on these membranes.

**Table S-3.** Water permeabilities of nylon membranes before and after modification with PAA monolayers.

| Monolayer in membrane pore | pH of PAA deposition solution | Water permeability of unmodified nylon membranes (mL/cm <sup>2</sup> min atm) | Water permeability of modified nylon membrane (mL/cm <sup>2</sup> min atm) | Reduction of Water permeability (%) |
|----------------------------|-------------------------------|-------------------------------------------------------------------------------|----------------------------------------------------------------------------|-------------------------------------|
| PAA                        | 2                             | 116±10                                                                        | 42±8                                                                       | 64±12                               |
|                            | 3                             | 143±11                                                                        | 46±15                                                                      | 68±14                               |
|                            | 4                             | 122±5                                                                         | 111±4                                                                      | 9±5                                 |
|                            | 5                             | 136±23                                                                        | 128±22                                                                     | 6±23                                |

Each experiment was repeated with two different membranes, and the ± values represent the standard deviation of multiple measurements on these membranes.

**Table S-4.** Water permeabilities of nylon membranes before and after modification with PAA-NTA-Cu<sup>2+</sup> films.

| Monolayer in membrane pore | pH of PAH and PAA deposition solution | Water permeability of unmodified nylon membranes (mL/cm <sup>2</sup> min atm)* | Water permeability of modified nylon membrane (mL/cm <sup>2</sup> min atm) | Reduction of Water permeability (%) |
|----------------------------|---------------------------------------|--------------------------------------------------------------------------------|----------------------------------------------------------------------------|-------------------------------------|
| PAA                        | 2                                     | 86±1                                                                           | 75±2                                                                       | 13±3                                |
|                            | 3                                     | 89±1                                                                           | 68±2                                                                       | 24±3                                |
|                            | 4                                     | 90±2                                                                           | 80±2                                                                       | 11±3                                |
|                            | 5                                     | 80±2                                                                           | 74±1                                                                       | 7.5±3                               |

Each experiment was repeated with two different membranes, and the ± values represent the standard deviation of multiple measurements on these membranes.

\*Membrane coupons were cut from a large sheet, and this particular batch of coupons showed a ~30% lower permeability (before modification) than others.

**Table S-5.** Water permeabilities of nylon membranes before and after modification with PAA/PAH/PAA or PAA/PEI/PAA.

| Multilayer in membrane pore | pH of PAH and PAA deposition solution | Water permeability of unmodified nylon membranes (mL/cm <sup>2</sup> min atm) | Water permeability of modified nylon membrane (mL/cm <sup>2</sup> min atm) | Reduction of Water permeability (%) |
|-----------------------------|---------------------------------------|-------------------------------------------------------------------------------|----------------------------------------------------------------------------|-------------------------------------|
| PAA/PAH/PAA                 | 3                                     | 114±7                                                                         | 25±5                                                                       | 78±9                                |
| PAA/PEI/PAA                 | 3                                     | 123±7                                                                         | 69±3                                                                       | 44±7                                |

Each experiment was repeated with two different membranes, and the ± values represent the standard deviation of multiple measurements on these membranes.

**Table S-6.** Water permeabilities of bare membranes and membranes modified with PAA/PAH/PAA-NTA-Cu<sup>2+</sup> or PAA/PEI/PAA-NTA-Cu<sup>2+</sup>.

| Multilayer in membrane pore | pH of PAH and PAA deposition solution | Water permeability of unmodified nylon membranes (mL/cm <sup>2</sup> min atm) | Water permeability of modified nylon membrane (mL/cm <sup>2</sup> min atm) | Reduction of Water permeability (%) |
|-----------------------------|---------------------------------------|-------------------------------------------------------------------------------|----------------------------------------------------------------------------|-------------------------------------|
| PAA/PAH/PAA                 | 3                                     | 118±4                                                                         | 59±2                                                                       | 50±4                                |
| PAA/PEI/PAA                 | 3                                     | 123±1                                                                         | 77±2                                                                       | 38±2                                |

Each experiment was repeated with two different membranes, and the ± values represent the standard deviation of multiple measurements on these membranes.

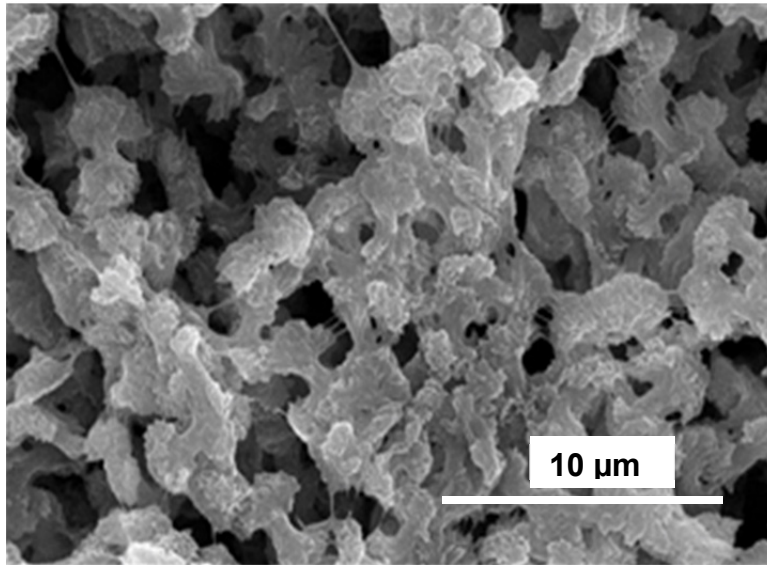

(a)

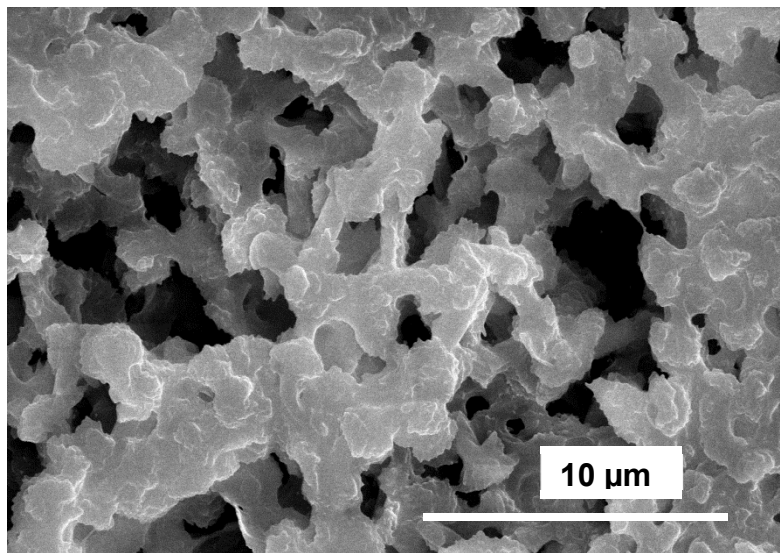

(b)

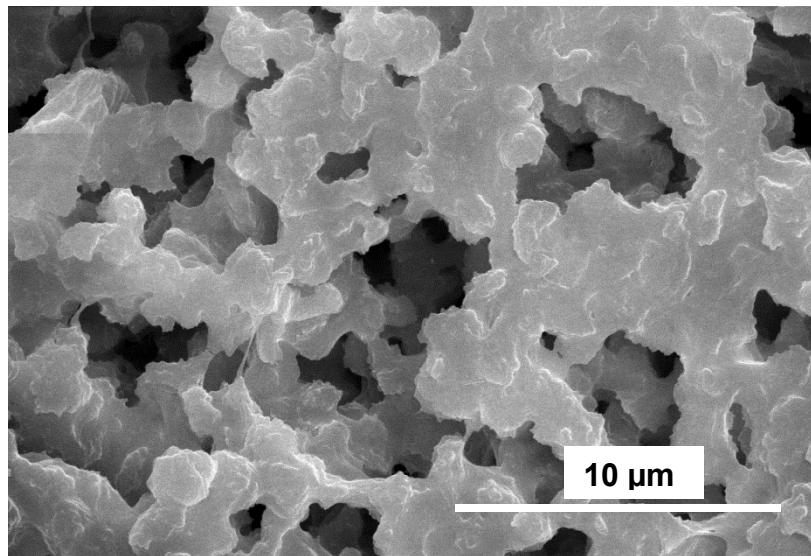

(c)

**Figure S-1.** SEM images of a bare nylon membrane with nominal 1.2  $\mu\text{m}$  pores (a), and similar membranes modified with PSS/PAH/PAA deposited at pH 2 (b) and pH 5 (c).

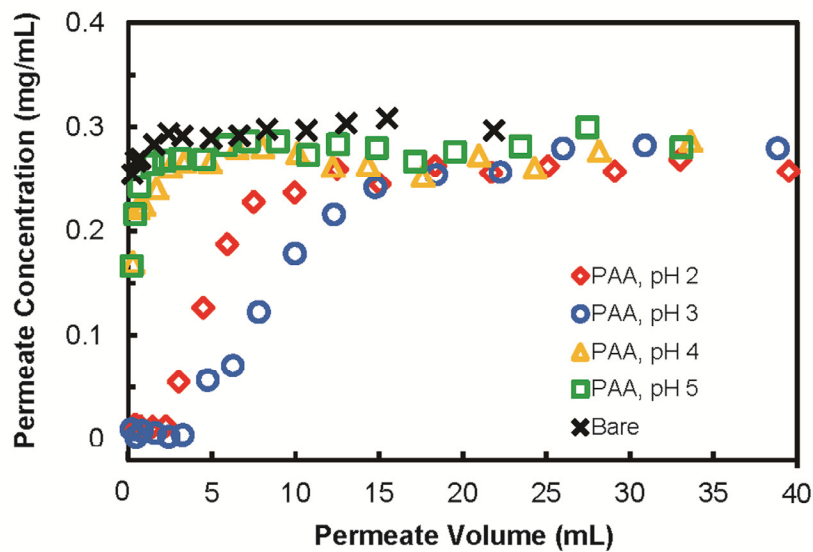

**Figure S-2.** Breakthrough curves for the passage of 0.3 mg/mL lysozyme through nylon membranes modified with single layers of PAA adsorbed at various pH values. The protein-solution flow rate was 1 mL/min, which corresponds to a linear velocity of 19 cm/h above the membrane.

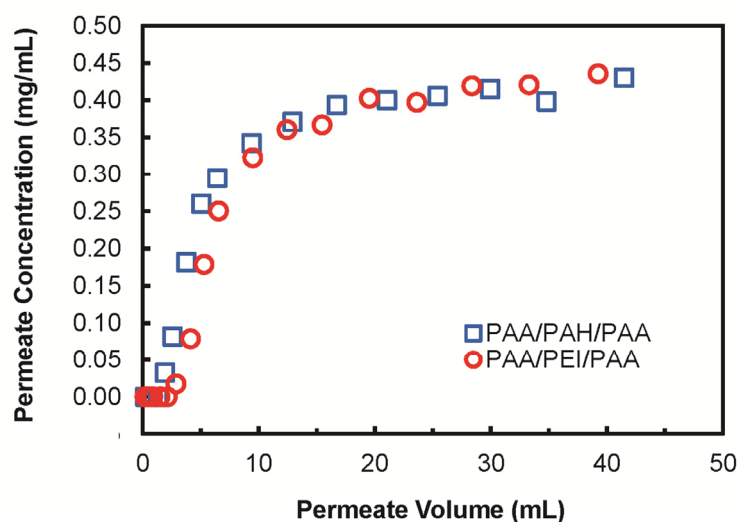

**Figure S-3.** Breakthrough curves for the passage of 0.45 mg/mL lysozyme through nylon membranes modified with PAA/PAH/PAA or PAA/PEI/PAA multilayers. The pH of PAA, PAH and PEI deposition solutions was 3, and the protein solution flow rate was 1 mL/min.

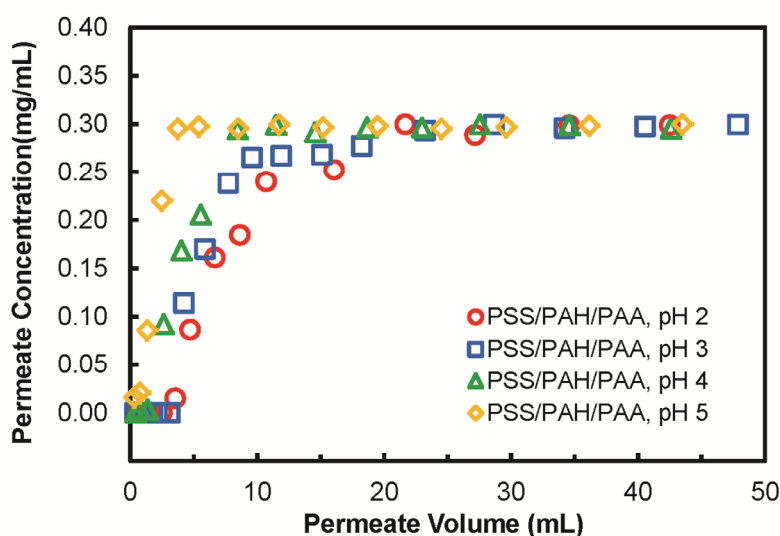

**Figure S-4.** Breakthrough curves for the passage of 0.3 mg/mL Con A (pH 6, 20 mM phosphate buffer) through nylon membranes modified with PSS/PAH/PAA-NTA-Cu<sup>2+</sup> films adsorbed at different pH values. The protein solution flow rate was 1 mL/min.

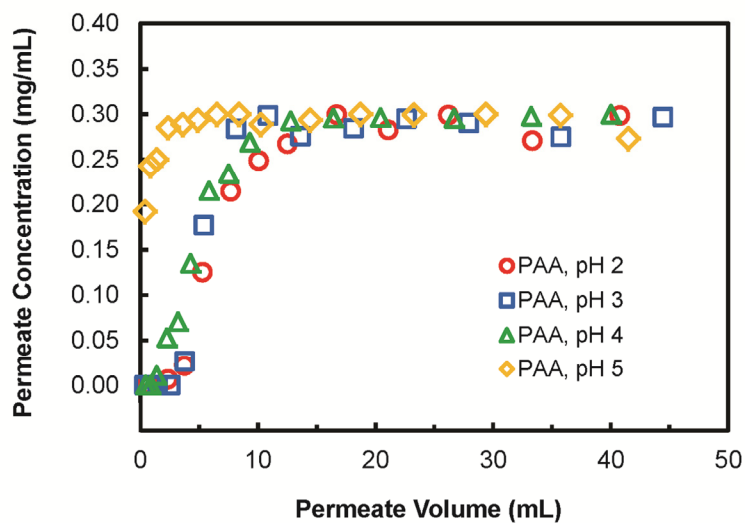

**Figure S-5.** Breakthrough curves for the passage of 0.3 mg/mL Con A through nylon membranes modified with PAA-NTA-Cu<sup>2+</sup> film (pH of PAA deposition solutions were varied). The protein solution flow rate was 1 mL/min.

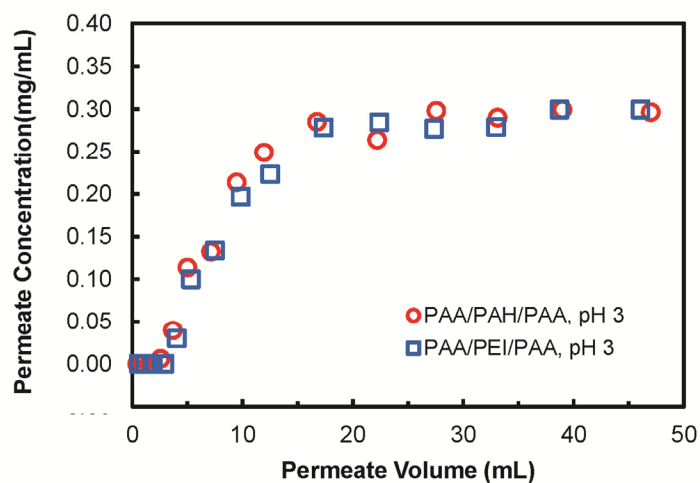

**Figure S-6.** Breakthrough curves for the passage of 0.3 mg/mL Con A through nylon membranes modified with PAA/PAH/PAA-NTA-Cu<sup>2+</sup> and PAA/PEI/PAA-NTA-Cu<sup>2+</sup> films. The protein solution flow rate was 1 mL/min.

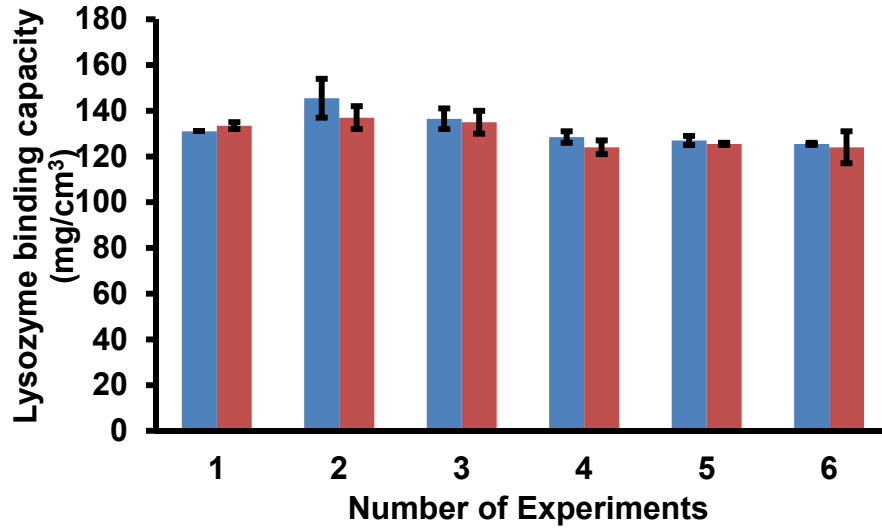

**Figure S-7.** Repetitive lysozyme binding capacities for nylon membranes modified with PAA/PEI/PAA films deposited at pH 3. (The blue and maroon bars show the different replicates on the two different membranes)

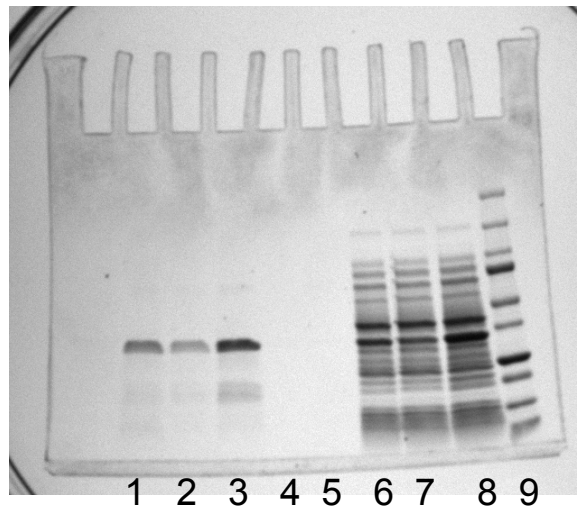

**Figure S-8.** The original gel image from which Figure 5(b) was taken (purification of CSN 8 from a cell extract). The lanes are: 1- first eluent from the membrane; 2- second eluent from a spin-trap column; 3- first eluent from a spin-trap column; 4- membrane wash; 5- spin-trap wash; 6- protein solution that passed through the membrane; 7- protein solution treated with the spin-trap column; 8- cell lysate; 9- protein ladder. Figure 5 in the text shows only lanes 9, 8, 6, and 1.
